# Supplementary material for: Comparative Study of The Yield and Physicochemical Properties of Collagen from Sea Cucumber (Holothuria scabra), Obtained through Dialysis and the Ultrafiltration Membrane
Source: MDPI journal article supplement (doi:10.3390/molecules26092564), 2021-04-28

## SUPPLEMENTARY DATA

**Figure S1.** The schematic diagram for collagen separation using ultrafiltration membrane

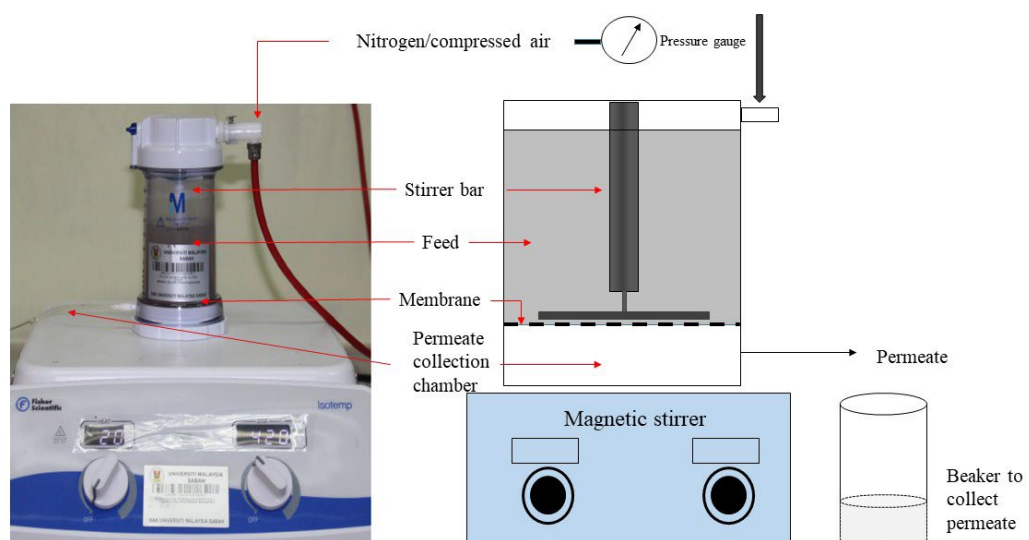

Supplement: s1 [file s1]
